# Supplementary material for: Chondromyxoid fibroma-like osteosarcoma: a case series and literature review
Source: PubMed Central journal article supplement (PMC6990471; doi:10.1186/s12891-020-3063-5), 2020-01-29

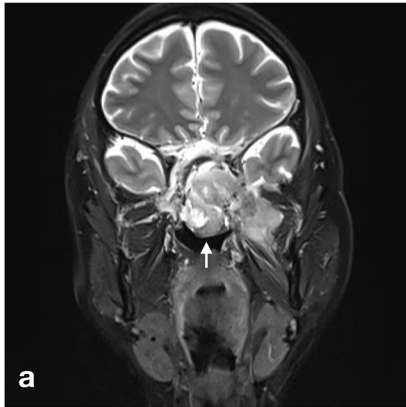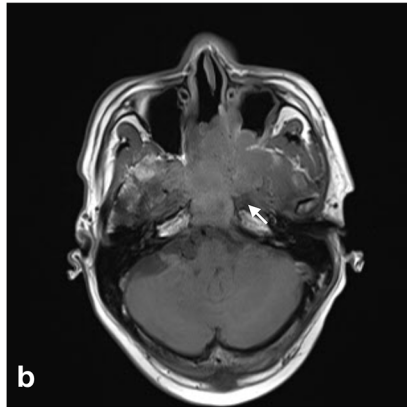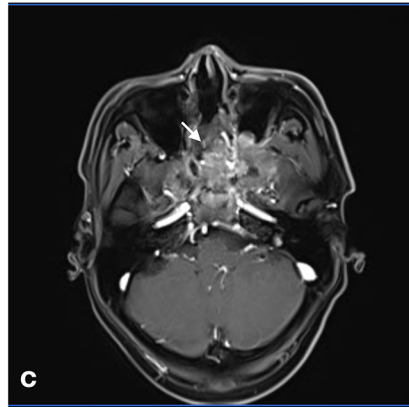

Supplement: 12891_2020_3063_MOESM2_ESM.pdf [file 12891_2020_3063_MOESM2_ESM.pdf]
