# Supplementary material for: Chondromyxoid fibroma-like osteosarcoma: a case series and literature review
Source: Springer Nature journal article supplement (doi:10.1186/s12891-020-3063-5), 2020-01-29

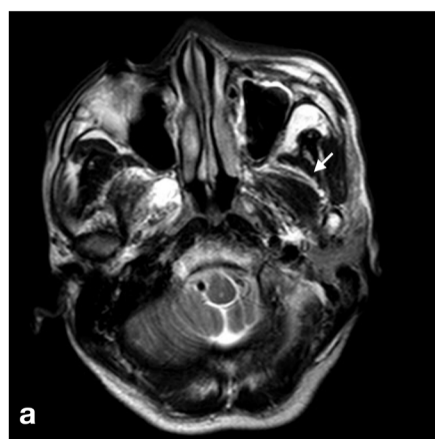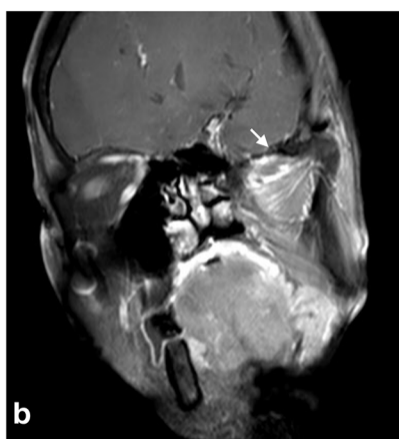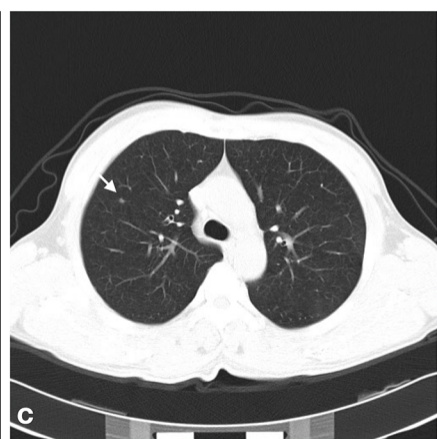

Supplement: MOESM4 [file 17611128]
